# 1 **Global and network functional connectivity of Nucleus Basalis** 2 **of Meynert is strengthened in blind individuals**

3 Ji Won Bang<sup>1\*</sup>, Russell W. Chan<sup>1</sup>, Carlos Parra<sup>1</sup>, Matthew, C. Murphy<sup>2-3</sup>, Joel S. Schuman<sup>1,4-6</sup>,  
4 Amy C. Nau<sup>3,7</sup>, Kevin C. Chan<sup>1,3-6,8\*</sup>

5  
6 <sup>1</sup>Department of Ophthalmology, NYU Grossman School of Medicine, NYU Langone Health, New  
7 York University, New York, New York, USA.

8 <sup>2</sup>Department of Radiology, Mayo Clinic, Rochester, Minnesota, USA.

9 <sup>3</sup>Department of Ophthalmology, School of Medicine, University of Pittsburgh, Pittsburgh, PA,  
10 USA.

11 <sup>4</sup>Neuroscience Institute, NYU Grossman School of Medicine, NYU Langone Health, New York  
12 University, New York, New York, USA.

13 <sup>5</sup>Center for Neural Science, College of Arts and Science, New York University, New York, New  
14 York, USA.

15 <sup>6</sup>Department of Biomedical Engineering, Tandon School of Engineering, New York University,  
16 New York, New York, USA.

17 <sup>7</sup>Korb and Associates, Boston, Massachusetts, USA.

18 <sup>8</sup>Department of Radiology, NYU Grossman School of Medicine, NYU Langone Health, New York  
19 University, New York, New York, USA.

20  
21

22 \*Co-Correspondence to:

23

24 Ji Won Bang, Ph.D.  
25 222 E 41st Street, Room 360  
26 Department of Ophthalmology  
27 NYU Grossman School of Medicine  
28 NYU Langone Health  
29 New York University, New York, NY, USA 10017  
30 Tel: (929) 455-5049 Fax: (212) 263-8749  
31 Email: JiWon.Bang@nyulangone.org  
32

33                   and  
34  
35                   Kevin C. Chan, Ph.D.  
36                   222 E 41st Street, Room 362  
37                   Departments of Ophthalmology and Radiology  
38                   NYU Grossman School of Medicine  
39                   NYU Langone Health  
40                   New York University, New York, NY, USA 10017  
41                   Tel:     (212) 263-7602                   Fax: (212) 263-8749  
42                   Email: [chuenwing.chan@fulbrightmail.org](mailto:chuenwing.chan@fulbrightmail.org)

43   **Total number of figures/tables:** 5 figures/1 table  
44

#### 45   **Acknowledgments**

46   We would like to thank Jacqueline Fisher, and Mark Vignone for their help with subject  
47   recruitment and technical support. This work is supported in part by the National Institutes of  
48   Health R01-EY028125 (Bethesda, Maryland), United States Department of Defense  
49   W81XWH2110615 (Arlington, Virginia), BrightFocus Foundation G2021001F (Clarksburg,  
50   Maryland), and an unrestricted grant from Research to Prevent Blindness to NYU Langone Health  
51   Department of Ophthalmology (New York, New York).

52

#### 53   **Declaration of Conflicting Interests**

54   The authors declare no conflict of interests.

55 **Abstract**

56 Vision loss causes dramatic changes in brain function which are thought to facilitate behavioral  
57 adaptation. One interesting prospect is that the cholinergic signals are involved in this  
58 blindness-induced plasticity. Critically, the nucleus basalis of Meynert is the principal source of  
59 the cholinergic signals, however, no studies have yet investigated whether the nucleus basalis  
60 of Meynert is altered in blindness. Therefore, here we examined its structure, cerebrovascular  
61 response, and the resting-state functional connectivity in blind individuals. We found that the  
62 global signal of the nucleus basalis of Meynert as well as its network connectivity with the  
63 visual, language, and default mode network is significantly enhanced in early blind individuals.  
64 On the other hand, its structure and cerebrovascular response remain unchanged in early blind  
65 individuals. Further, we observed that less visual experience predicts stronger global and  
66 network connectivity of the nucleus basalis of Meynert. These results suggest that the nucleus  
67 basalis of Meynert develops a stronger neuromodulatory influence on the cortex of blind  
68 individuals at both global and network levels.

69

70

71

72

73

74

75

76

77

78 **Keywords:** nucleus basalis of Meynert, blindness, global connectivity, network connectivity,  
79 resting-state, fMRI, plasticity, choline, plasticity

80

## 81 **Introduction**

82

83 The brain retains a profound amount of plasticity which enables us to adapt to environmental  
84 demands (Bang and others 2021; Bruel-Jungerman and others 2007). Particularly, loss of vision  
85 has been a critical model for investigating brain plasticity. Ample amount of evidence indicates  
86 that blind individuals perform better than sighted people at various non-visual tasks including  
87 echolocation (Lessard and others 1998; Voss and others 2004), pitch discrimination (Gougoux  
88 and others 2004), speech discrimination (Niemeyer and Starlinger 1981), verbal memory  
89 (Amedi and others 2003; Hull and Mason 1995) and tactile discrimination (Goldreich and Kanics  
90 2003; Van Boven and others 2000).

91

92 One of the influential mechanisms proposed to explain this superior ability of blind individuals is  
93 that compensatory alterations occur in the brain which enhance the processing of non-visual  
94 input (Fine and Park 2018). Indeed, compelling evidence indicates that the blind individuals'  
95 visual cortex becomes recruited for a wide range of non-visual tasks such as Braille reading  
96 (Burton and others 2002; Kupers and others 2007; Sadato and others 1996), auditory localization  
97 (Norman and Thaler 2019; Voss and others 2006), sensory substitution tasks (Murphy and others  
98 2016; Nau and others 2015; Ptito and others 2005; Striem-Amit and others 2012), verbal memory  
99 (Amedi and others 2003), language (Bedny and others 2011; Bedny and others 2015), and  
100 mathematics (Amalric and others 2018; Kanjlia and others 2019). When the visual cortex was  
101 disrupted by transcranial magnetic stimulation during the task, the performance was impaired in  
102 blind individuals (Merabet and others 2009). Beyond the visual cortex, the left superior temporal  
103 sulcus, and the fusiform area were shown to be activated to a greater extent during voice

104 discrimination in congenitally blind individuals (Gougoux and others 2009). This line of studies  
105 suggests that the cortical functional reorganization occurs in blindness that may modulate  
106 various behavioral adaptations.

107

108 In particular, cholinergic signals have been suggested to play a role in blindness-induced  
109 compensatory alterations. The nucleus basalis of Meynert (NBM) provides the major source of  
110 cholinergic signals to the cortex. The cholinergic input from NBM innervates diffusively the  
111 cortex including both primary sensory areas and high-order association areas (Mesulam and  
112 others 1983; Mesulam and others 1984). Critically, the cholinergic signals are involved in  
113 attention (Everitt and Robbins 1997; Sarter and others 2005) and experience-dependent  
114 cortical plasticity (Bakin and Weinberger 1996; Froemke and others 2007; Kilgard and  
115 Merzenich 1998). In addition, the cholinergic neurons in NBM are known to rapidly modulate  
116 sensory processing (Goard and Dan 2009; Pinto and others 2013). For example, when NBM is  
117 stimulated electrically or optogenetically, the cortical coding of visual information in V1 is  
118 enhanced (Goard and Dan 2009; Pinto and others 2013) and the performance on a visual task is  
119 improved in animals (Pinto and others 2013).

120

121 Relatedly, the input from NBM is thought to play a key role in orchestrating spontaneous  
122 activity across the brain (Turchi and others 2018). The resting-state fMRI provides a useful  
123 platform to investigate spontaneous brain activity. This spontaneous brain activity is  
124 distinguishable into two qualitatively different signals. The first one is a network signal that is a  
125 specific correlation between different brain areas. This network signal reflects the functionally

126 connected network architecture (Damoiseaux and others 2006). Further, studies showed that  
127 this network signal is constrained by large-scale anatomical connections (Hagmann and others  
128 2008; Honey and others 2009). On the other hand, global signal refers to broadly shared signal  
129 across the neocortex (Scholvinck and others 2010). This global signal is suggested to reflect  
130 large-scale coordination of brain activity (Cole and others 2010). Building on this, a recent study  
131 demonstrated that NBM regulates global signal fluctuations (Turchi and others 2018).  
132 Specifically, when NBM was inactivated, the global signal components ipsilateral to the  
133 injection site were suppressed whereas the specific correlations that define resting-state  
134 networks were unaffected. This finding suggests that the input of NBM contributes to the  
135 global signals but has little influence on the network signals.

136

137 In the field of blindness-induced plasticity, the amount of choline was observed to be higher in  
138 the visual cortex of early blind individuals (Coullon and others 2015; Weaver and others 2013).  
139 An interesting question arises from this observation, namely, whether NBM plays a causal role  
140 in enhancing the cholinergic signals in the blind's visual cortex. This idea is supported by the  
141 fact that NBM sends cholinergic projections to the entire cortex including visual areas  
142 (Mesulam and others 1983; Mesulam and others 1984).

143

144 Here, we propose that NBM develops a stronger influence to the neocortex of blind individuals  
145 in order to facilitate non-visual processing. Using anatomical MRI and resting-state functional  
146 MRI, we provide novel support for this prediction, presenting enhanced global and network  
147 connectivity of NBM during rest in early blind individuals. Particularly, the cortical networks

148 that present increased network connectivity with NBM include visual networks bilaterally  
149 (occipital visual cortex, lateral visual cortex, medial visual cortex), language networks of the left  
150 hemisphere (inferior frontal gyrus (IFG), posterior superior temporal gyrus (pSTG)), and default  
151 mode network (posterior cingulate cortex (PCC)). We further confirmed that these changes in  
152 the network and global connectivity of NBM in early blind individuals are not affected by the  
153 structural or cerebrovascular changes of NBM. While these alterations of the network  
154 connectivity, as well as global connectivity, are significant only within the early blind individuals,  
155 the years of visual experience predict both network and global connectivity among early blind,  
156 late blind individuals, and sighted controls. These results suggest that NBM may develop  
157 stronger cholinergic innervations onto the cortex to support behavioral adaptation in blind  
158 individuals.

159

160

161 **Materials and Methods**

162 Participants

163 Forty-nine subjects (29 females, mean age  $54.67 \pm 2.12$ ) without any history of neurological  
164 disorders participated in the study. Seven subjects were congenitally blind, sixteen subjects  
165 were late-blind individuals, and twenty-six subjects were sighted controls. One among late blind  
166 individuals was later excluded from the entire analysis because the functional MR scan failed to  
167 cover NBM. Additional one early blind individual was excluded from the rCVR analysis due to a  
168 problem in rCVR computation but included for other analyses. The demographic data of the  
169 early and late blind individuals are depicted in Table 1. Age and gender were not significantly  
170 different across three groups (age:  $F(2,45)=0.118$ ,  $P=0.889$ , partial  $\eta^2=0.005$ , one-way ANOVA;  
171 gender:  $\chi^2(2)=0.614$ ,  $P=0.736$ ,  $\Phi=0.113$ , Pearson Chi-Square test). This study was approved by  
172 the Institutional Review Board of the University of Pittsburgh. All subjects provided written  
173 informed consent.

174



| Gender | Age (years) | Onset age (years) | Duration of blindness (years) | Cause                                              |
|--------|-------------|-------------------|-------------------------------|----------------------------------------------------|
| M      | 58          | 51                | 7                             | Traumatic accident                                 |
| F      | 59          | 53                | 6                             | Congenital cataracts, aniridia, pediatric glaucoma |
| F      | 53          | 28                | 25                            | diabetic retinopathy                               |
| M      | 62          | 51                | 11                            | Traumatic accident                                 |
| F      | 64          | 0                 | 64                            | congenital                                         |
| M      | 25          | 0                 | 25                            | congenital                                         |
| F      | 58          | 0                 | 58                            | congenital                                         |
| F      | 35          | 31                | 4                             | Traumatic accident                                 |
| M      | 55          | 35                | 20                            | Trauma accident                                    |
| M      | 56          | 0                 | 56                            | congenital                                         |
| M      | 58          | 7                 | 51                            | encephalitis                                       |
| F      | 58          | 46                | 12                            | glaucoma                                           |
| M      | 18          | 13                | 5                             | pigmentosa                                         |
| F      | 60          | 0                 | 60                            | retinopathy of prematurity                         |
| F      | 62          | 0                 | 62                            | congenital                                         |
| F      | 71          | 59                | 12                            | glaucoma                                           |
| F      | 60          | 31                | 29                            | glaucoma                                           |
| M      | 75          | 59                | 16                            | pigmentosa                                         |
| F      | 39          | 17                | 22                            | retinopathy of prematurity                         |
| F      | 30          | 23                | 7                             | tumors                                             |
| M      | 63          | 0                 | 63                            | retinopathy of prematurity                         |
| M      | 64          | 54                | 10                            | detached retinas                                   |

175

176 **Table 1.** Subject demographic and clinical information

177

178 MRI data acquisition

179 MRI data were collected with a 3 T Siemens Allegra MR scanner. Anatomical MR images were  
180 obtained using a T1-weighted MPRAGE (176 contiguous 1-mm sagittal slices, voxel size = 1×1×1  
181 mm<sup>3</sup>, repetition time (TR) = 1400 ms, echo time (TE) = 2.5 ms, field of view (FOV) = 256×256  
182 mm<sup>2</sup>, flip angle = 8°, acquisition matrix = 256×256). Functional images were obtained using a  
183 single-shot gradient-echo echo-planar imaging (EPI) sequence (36 contiguous 3-mm axial slices,

184 voxel size =  $2 \times 2 \times 3 \text{ mm}^3$ , TR = 2000 ms, TE = 25 ms, FOV =  $205 \times 205 \text{ mm}^2$ , acquisition matrix =  
185  $64 \times 64$ ) while subjects were at rest with eyes closed. The slices covered the whole brain.

186

### 187 MRI Voxel-based morphometry (VBM) analysis

188 We conducted VBM analysis to test whether NBM presents any atrophy within the grey and  
189 white matter. T1-weighted MRI images were segmented and normalized to MNI space using  
190 SPM12 (<http://www.fil.ion.ucl.ac.uk/spm/>). Then, the images were smoothed using a Gaussian  
191 kernel of 6mm FWHM.

192

### 193 Resting-state fMRI analysis

194 T1-weighted MRI and resting-state fMRI images were preprocessed using CONN's default MNI  
195 pipeline in CONN toolbox, version 18.a ([www.nitrc.org/projects/conn,RRID:SCR\\_009550](http://www.nitrc.org/projects/conn,RRID:SCR_009550))  
196 (Whitfield-Gabrieli and Nieto-Castanon 2012). The default preprocessing steps included the  
197 functional realignment and unwarping, slice-timing correction, functional outlier detection,  
198 functional segmentation and normalization, structural segmentation and normalization,  
199 functional smoothing using a Gaussian kernel of 8mm FWHM. The noise components from  
200 cerebral white matter, cerebrospinal fluid, estimated subject-motion parameters, scrubbing,  
201 and linear session effects were removed from the functional images for each voxel and each  
202 subject using an anatomical component-based noise correction procedure (aCompCor)  
203 implemented in CONN's default de-noising pipeline. The functional images were then band-  
204 pass filtered to 0.008 Hz – 0.09 Hz.

205

206 The map of NBM on MNI space was obtained from SPM Anatomy toolbox version 3.0  
207 (Zaborszky and others 2008). In particular, this NBM map was created based on stereotaxic  
208 probabilistic maps of the basal forebrain. Magnocellular cell groups in the subcommissural-  
209 sublenticular region of the basal forebrain were delineated and then warped to the MNI space  
210 (Zaborszky and others 2008). The functional connectivity of the seed NBM was then computed  
211 using CONN toolbox. For global correlation analysis, we calculated the average of correlation  
212 coefficients between each voxel and the rest voxels of the brain across time series. Then we  
213 extracted the global correlation coefficients from the voxels corresponding to seed NBM and  
214 averaged them across the seed voxels to identify NBM's brain-wide correlation properties. For  
215 ROI-level analysis, we used 30 cortical networks that CONN generated. These include default  
216 mode network (bilateral lateral parietal cortex, medial prefrontal cortex, posterior cingulate  
217 cortex), dorsal attention network (bilateral frontal eye fields, bilateral intraparietal sulcus),  
218 frontoparietal network (bilateral lateral prefrontal cortex, bilateral posterior parietal cortex),  
219 language network (bilateral inferior frontal gyrus, bilateral posterior superior temporal gyrus),  
220 salience network (anterior cingulate cortex, bilateral anterior insular cortex, bilateral rostral  
221 prefrontal cortex, bilateral supramarginal gyrus), sensorimotor network (bilateral lateral  
222 sensorimotor cortex, superior sensorimotor cortex), and visual network (bilateral lateral visual  
223 cortex, medial visual cortex, occipital visual cortex). We computed the correlation coefficients  
224 between the seed NBM and all 30 cortical networks and converted them to z-value using  
225 Fisher's r-to-z transformation (Lowe and others 1998). For voxel-level analysis, the correlation  
226 coefficients were obtained between the seed NBM and each voxel and were converted to z-  
227 value using Fisher's r-to-z transformation.

228

229 rCVR analysis

230 rCVR maps were obtained from the resting-state fMRI images using MriCloud

231 (<https://mricloud.org/>). Following prior methods (Liu and others 2017), we computed the voxel-

232 wise CVR index ( $\alpha$ ) using a general linear model between normalized BOLD time series

233 ( $\Delta$ BOLD/BOLD) and the global signal time series ( $GS$ ). Then we calculated the voxel-wise rCVR

234 by normalizing  $\alpha$  by tissue signal intensity averaged across the whole brain ( $SI$ ). The residuals

235 term ( $\beta$ ) was not used for analysis. Below is the summary of these steps.

236 
$$\text{rCVR} = \frac{\alpha}{SI} \text{ where } \alpha \text{ is obtained from } \frac{\Delta\text{BOLD}}{\text{BOLD}} = \alpha \cdot GS + \beta$$

237

238 We extracted rCVR values from NBM and 30 cortical networks which are in MNI space.

239

240 Statistics

241 For all statistical analyses, we used two-tailed parametric tests with statistical significance set at

242  $P < 0.05$ . We assessed the assumption of sphericity for all measures ANCOVAs using Mauchly's

243 sphericity tests. When the assumption of sphericity was violated, we reported Huynh-Feldt

244 corrected results. In the following post-hoc tests, we used Bonferroni method to correct the

245 multiple comparisons and reported Bonferroni-corrected P values. For whole-brain voxel-level

246 analysis, a voxel height threshold of  $p < 0.001$  and a cluster height threshold of  $p\text{-FDR}$

247 corrected  $< 0.05$  were used.

248

249 Data Availability

250 The global and network connectivity, rCVR, and the structural volume data are freely available

251 at <https://osf.io/axy45/>.

252

253

## 254 Results

255 We first examined whether the white and grey matter of NBM (**Fig. 1A**) are altered in blindness  
256 using VBM analysis. For this, we applied a one-way ANCOVA with a factor group (control, early  
257 blind, late blind) to the white and grey matter volumes of NBM as controlling for total  
258 intracranial volume and age. The results revealed no significant main effect of group for both  
259 white and grey matter (white matter volume:  $F(2,43)=1.705$ ,  $P=0.194$ , partial  $\eta^2=0.073$ ; grey  
260 matter volume:  $F(2,43)=1.063$ ,  $P=0.354$ , partial  $\eta^2=0.047$ ), suggesting that the anatomical  
261 structure of NBM remains intact in blindness.

262

263 Next, we investigated whether NBM presents enhanced global signals in blind individuals. To  
264 test for this effect, we computed the global connectivity between NBM and all other cortical  
265 voxels. Then, we conducted a one-way ANCOVA with a factor group (control, early blind, late  
266 blind) controlling for age. The results showed a significant main effect of group ( $F(2,45)=3.530$ ,  
267  $P=0.038$ , partial  $\eta^2=0.136$ ; **Fig. 1B**). Further post-hoc tests showed that the early blind group has  
268 significantly greater global connectivity compared to sighted controls (control vs. early blind,  
269  $P=0.034$ , 95% CI=-1.814 – -0.055). However, this increased global connectivity of NBM in the  
270 early blind group did not differ from that in the late blind group (early blind vs. late blind,  
271  $P=0.248$ , 95% CI=-0.268 – 1.605; control vs. late blind,  $P=0.957$ , 95% CI=-0.923 – 0.391). Further,  
272 we examined whether the global connectivity of NBM is associated with the years of visual  
273 experience by conducting a partial correlation analysis controlling for age. The results showed  
274 that less visual experience predicts a stronger global signal of NBM ( $r=-0.453$ ,  $p=0.001$ ; **Fig. 1C**).

275

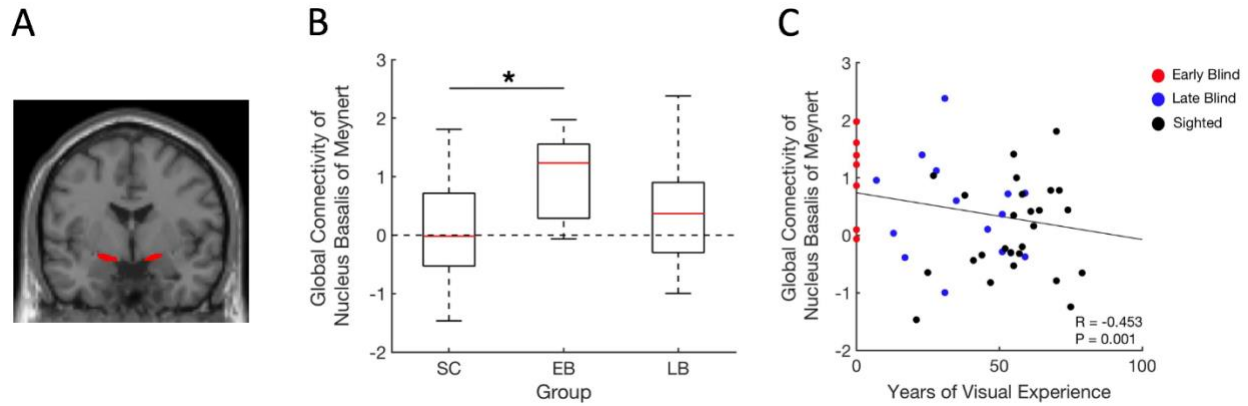

276  
277 **Fig. 1.** The Nucleus Basalis of Meynert. (A) Coronal view of the nucleus basalis of Meynert. (B)  
278 Global connectivity between the nucleus basalis of Meynert and the entire cortical areas is  
279 significantly increased in the early blind group compared to sighted controls. The distributions  
280 are represented using box plots. “SC”, “EB,” and “LB” refer to the sighted controls, early blind  
281 and late blind groups. \* Bonferroni-corrected  $P < 0.05$ . (C) Years of visual experience predict  
282 global connectivity of nucleus basalis of Meynert. Each point represents one subject. Red, blue  
283 and black colors indicate early blind, late blind, and sighted controls. The R and P values in the  
284 figure refer to the result of a partial correlation test between years of visual experience and  
285 global connectivity of nucleus basalis of Meynert controlling for age.  $N=48$ .  
286

287 Having confirmed the enhanced global signal of NBM in early blind individuals, we further  
288 examined whether early blind individuals have increased network connectivity as well. We  
289 addressed this question using ROI- and voxel-based analyses. For ROI-based analysis, we  
290 created 30 cortical network ROIs (see Materials and Methods) and computed the functional  
291 connectivity between NBM and each of the network ROIs. We then conducted a two-way mixed  
292 measures ANCOVA with factors group (control, early blind, late blind) and network (30 cortical  
293 networks) to the functional connectivity controlling for age. The results revealed a significant  
294 main effect of group ( $F(2,44)=9.339$ ,  $P<0.001$ , partial  $\eta^2=0.298$ ) and significant interaction  
295 between group and network ( $F(58,1276)=1.754$ , Huynh-Feldt correction,  $P=0.015$ , partial  
296  $\eta^2=0.074$ ) but no main effect of network ( $F(29,1276)=0.952$ ,  $P=0.494$ , partial  $\eta^2=0.021$ ).  
297 Following post-hoc tests showed that the functional connectivity of the early blind individuals is

298 greater than that of the sighted controls and late blind individuals (control vs. early blind:  
299  $P < 0.001$ , 95% CI = -0.160 – -0.043; control vs. late blind:  $P = 0.760$ , 95% CI = -0.065 – 0.024; early  
300 blind vs. late blind:  $P = 0.008$ , 95% CI = 0.018 – 0.143). Further, a significant interaction between  
301 group and network suggests that the functional connectivity changes across the group and that  
302 this pattern of change differs across networks.

303

304 Given the significant interaction between group and network, we examined more in detail how  
305 the functional connectivity changes across networks by conducting a one-way ANCOVA with a  
306 factor group (control, early blind, late blind) to each network as controlling for age. The results  
307 revealed a significant main effect of group at visual networks bilaterally (occipital visual cortex:  
308  $F(2, 44) = 5.491$ ,  $P = 0.007$ , partial  $\eta^2 = 0.200$ ; left lateral visual cortex:  $F(2, 44) = 8.853$ ,  $P = 0.001$ ,  
309 partial  $\eta^2 = 0.287$ ; right lateral visual cortex:  $F(2, 44) = 10.818$ ,  $P < 0.001$ , partial  $\eta^2 = 0.330$ ; medial  
310 visual cortex:  $F(2, 44) = 9.861$ ,  $P < 0.001$ , partial  $\eta^2 = 0.310$ ; **Fig. 2B**), language networks of the left  
311 hemisphere (left posterior superior temporal gyrus:  $F(2, 44) = 10.413$ ,  $P < 0.001$ , partial  $\eta^2 = 0.321$ ;  
312 left inferior frontal gyrus:  $F(2, 44) = 8.105$ ,  $P = 0.001$ , partial  $\eta^2 = 0.269$ ; **Fig. 2B**), and default mode  
313 network (posterior cingulate cortex:  $F(2, 44) = 5.245$ ,  $P = 0.009$ , partial  $\eta^2 = 0.193$ ; **Fig. 2B**).

314 Following post-hoc tests showed that in the occipital visual cortex, the early blind group has  
315 higher functional connectivity compared to sighted controls (control vs. early blind:  $P = 0.006$ ,  
316 95% CI = -0.441 – -0.060; control vs. late blind:  $P = 0.542$ , 95% CI = -0.224 – 0.066; early blind vs.  
317 late blind:  $P = 0.129$ , 95% CI = -0.033 – 0.376). In the left lateral visual cortex, the functional  
318 connectivity of the early blind group is higher than that of the sighted controls and late blind  
319 group (control vs. early blind:  $P < 0.001$ , 95% CI = -0.465 – -0.117; control vs. late blind:  $P = 0.236$ ,



320 95% CI=-0.229 – 0.037; early blind vs. late blind: P=0.040, 95% CI=0.007 – 0.383). Similar post-  
 321 hoc results, that is significantly increased functional connectivity of the early blind group  
 322 compared to that of the sighted controls and late blind group were observed in the right lateral  
 323 visual cortex (control vs. early blind: P<0.001, 95% CI=-0.533 – -0.155; control vs. late blind:  
 324 P=0.083, 95% CI=-0.276 – 0.012; early blind vs. late blind: P=0.039, 95% CI=0.008 – 0.416),  
 325 medial visual cortex (control vs. early blind: P<0.001, 95% CI=-0.492 – -0.138; control vs. late  
 326 blind: P=0.389, 95% CI=-0.219 – 0.051; early blind vs. late blind: P=0.013, 95% CI=0.041 –  
 327 0.422), left posterior superior temporal gyrus (control vs. early blind: P<0.001, 95% CI=-0.421 – -  
 328 0.119; control vs. late blind: P=0.098, 95% CI=-0.218 – 0.013; early blind vs. late blind: P=0.041,  
 329 95% CI=0.005 – 0.331), left inferior frontal gyrus (control vs. early blind: P=0.002, 95% CI=-0.373  
 330 – -0.75; control vs. late blind: P=1.000, 95% CI=-0.097 – 0.131; early blind vs. late blind:  
 331 P=0.002, 95% CI=0.081 – 0.402), and posterior cingulate cortex (control vs. early blind: P=0.008,  
 332 95% CI=-0.359 – -0.044; control vs. late blind: P=1.000, 95% CI=-0.134 – 0.107; early blind vs.  
 333 late blind: P=0.026, 95% CI=0.018 – 0.357).

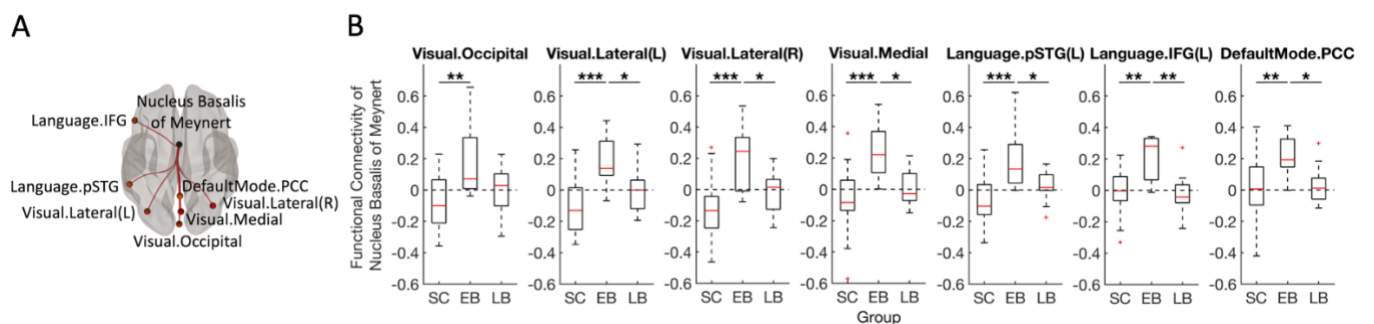

334  
 335

336 **Fig. 2.** Early blind individuals have increased functional connectivity between nucleus basalis of  
 337 Meynert and cortical networks including visual networks, language networks, and default mode  
 338 network. (A) Schematic depiction of the nucleus basalis of Meynert and seven cortical networks  
 339 (occipital, lateral, medial visual cortices, left posterior superior temporal gyrus, left inferior  
 340 frontal gyrus, posterior cingulate cortex) which showed enhanced connectivity with the nucleus  
 341 basalis of Meynert in the early blind group. (B) Functional connectivity between the nucleus  
 342 basalis of Meynert and seven cortical networks. The distributions are represented using box

343 plots and the outliers are plotted as plus signs. "SC", "EB," and "LB" refer to the sighted  
344 controls, early blind and late blind groups. \* Bonferroni-corrected  $P < 0.05$ , \*\* Bonferroni-  
345 corrected  $P < 0.01$ .  $N=48$ .

346

347

348 The above analyses were conducted on averaged functional connectivity across large-scale

349 brain networks. For completeness, we also examined the functional network connectivity of

350 NBM at the voxel level. For this, we computed the functional connectivity between NBM and

351 each cortical voxel. We then conducted a one-way ANCOVA with a factor group (control, early

352 blind, late blind) controlling for age. As in the above ROI-level analysis, we observed a

353 significant main effect of group within the visual cortex bilaterally, and the left middle temporal

354 gyrus (**Fig. 3A**). Additionally, the voxel-level analysis found group difference in the bilateral

355 fusiform area, which was previously included in the medial visual network during the ROI-level

356 analysis. Further post-hoc tests (**Fig. 3B**) revealed that this group difference was driven by the

357 early blind group. A comparison between early blind and sighted controls revealed that early

358 blind individuals have greater functional connectivity of NBM at the visual cortex bilaterally,

359 and left superior, middle, inferior temporal gyrus, as well as fusiform area bilaterally. Another

360 comparison between early and late blind groups showed that the early blind group has

361 significantly higher connectivity of NBM at the right visual cortex. On the other hand, late blind

362 and sighted controls did not yield a significant difference at any voxels. These results replicate

363 the ROI-level analysis results although the voxel-level analysis did not observe significant

364 changes within the left inferior frontal gyrus (language network) and the posterior cingulate

365 cortex (default mode network), possibly due to multiple comparisons correction at the voxel

366 level.

367

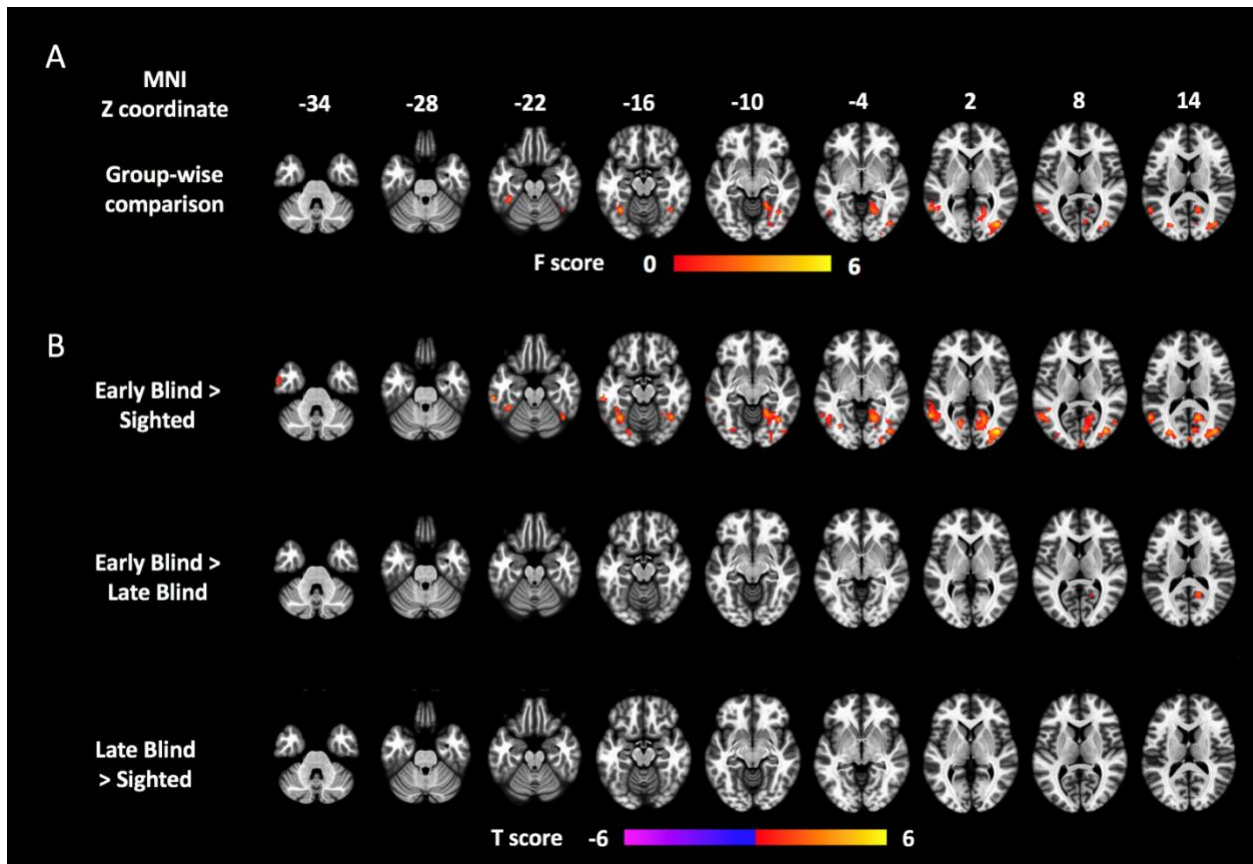

368

369 **Fig. 3.** Group difference of functional connectivity of the nucleus basalis of Meynert. (A) F map  
370 for the group-wise difference. Significant group differences are observed in the bilateral visual  
371 cortex, left middle temporal gyrus, and bilateral fusiform area. (B) Post-hoc group-wise t-tests  
372 between groups. The early blind individuals have increased connectivity of nucleus basalis of  
373 Meynert within the bilateral visual cortex, left superior, middle, inferior temporal gyrus, and the  
374 bilateral fusiform area compared to sighted controls. Another comparison between early and  
375 late blind individuals shows that the early blind group has higher connectivity in the right visual  
376 cortex. The late blind and sighted individuals did not show any significant difference. N=48  
377

378

379 Since the voxel-level results replicate the findings of the ROI-level analysis, we further explored  
380 whether the increase of functional connectivity between NBM and cortical networks is  
381 negatively associated with the years of visual experience. For this, we conducted partial  
382 correlation analyses controlling for age, using six cortical networks which showed enhanced  
383 connectivity with NBM in the early blind group. The results revealed significant correlations

384 within visual networks (occipital visual network:  $r=-0.452$ ,  $p=0.001$ ; left lateral visual network:  
385  $r=-0.548$ ,  $p<0.001$ ; right lateral visual network:  $r=-0.568$ ,  $p<0.001$ ; medial visual network:  $r=-$   
386  $0.555$ ,  $p<0.001$ ), language networks (left posterior superior temporal gyrus:  $r=-0.527$ ,  $p<0.001$ ;  
387 left inferior frontal gyrus:  $r=-0.389$ ,  $p=0.007$ ), and default mode network (posterior cingulate  
388 cortex:  $r=-0.386$ ,  $p=0.007$ ; **Fig. 4**). The results indicate that less visual experience predicts  
389 greater functional connectivity of NBM within these networks.  
390

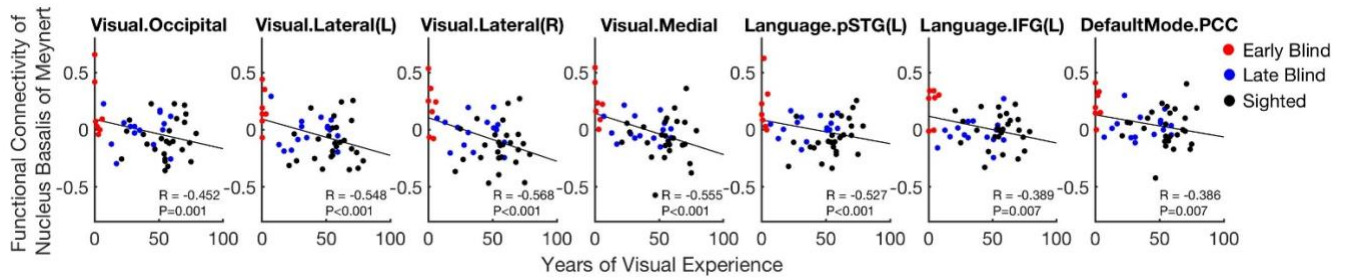

391  
392 **Fig. 4.** Years of visual experience predict functional connectivity of nucleus basalis of Meynert.  
393 Significant correlations were observed within visual networks (occipital, lateral, medial visual  
394 areas), language networks (left posterior superior temporal gyrus, left inferior frontal gyrus),  
395 and default mode network (posterior cingulate cortex). Each point represents one subject. Red,  
396 blue and black colors indicate early blind, late blind, and sighted controls. For visualization  
397 purposes, early-blind data points are plotted apart from each other although their x values are  
398 all 0. The R and P values in the figure refer to the results of partial correlation tests between  
399 years of visual experience and functional connectivity of nucleus basalis of Meynert controlling  
400 for age. N=48.

401  
402  
403 Finally, we examined whether these global and network signals are affected by cerebrovascular  
404 changes using the relative cerebrovascular reactivity (rCVR) map computed from resting-state  
405 fMRI (see Materials and Methods). The rCVR measures the cerebral blood vessels' ability to  
406 dilate or constrict in response to vasoactive stimuli (Liu and others 2019). Since the BOLD  
407 signals in the resting-state fMRI are tightly related to the degree to which cerebral blood

408 vessels respond to the neurovascular coupling chemical signals (Gauthier and Fan 2019), it is  
409 important to examine whether the observed resting-state functional connectivity changes in  
410 the early blind group are influenced by cerebrovascular changes. To test whether there are any  
411 alterations of rCVR within NBM and the cortical networks that showed significant changes in  
412 the early blind group, we applied a one-way ANCOVA with a factor group (control, early blind,  
413 late blind) to the rCVR measures controlling for age. We observed no significant main effect of  
414 group in NBM ( $F(2, 43)=0.257$ ,  $P=0.775$ , partial  $\eta^2=0.012$ ), left lateral visual cortex ( $F(2,$   
415  $43)=2.094$ ,  $P=0.136$ , partial  $\eta^2=0.089$ ), and left inferior frontal gyrus ( $F(2, 43)=0.417$ ,  $P=0.662$ ,  
416 partial  $\eta^2=0.019$ ; **Fig. 5**). However, significant main effect of group was observed in the occipital  
417 visual cortex ( $F(2, 43)=4.114$ ,  $P=0.023$ , partial  $\eta^2=0.161$ ), right lateral visual cortex ( $F(2,$   
418  $43)=3.235$ ,  $P=0.049$ , partial  $\eta^2=0.131$ ), medial visual cortex ( $F(2, 43)=3.292$ ,  $P=0.047$ , partial  
419  $\eta^2=0.133$ ), left posterior superior temporal gyrus ( $F(2, 43)=3.279$ ,  $P=0.047$ , partial  $\eta^2=0.132$ )  
420 and posterior cingulate cortex ( $F(2, 43)=3.725$ ,  $P=0.032$ , partial  $\eta^2=0.148$ ; **Fig. 5**). Further post-  
421 hoc tests revealed that this significant main effect of group is driven by the reduced rCVR of the  
422 late blind individuals, but not by that of the early blind individuals. Specifically, significant  
423 differences between sighted controls and late blind group were observed within the occipital  
424 visual cortex ( $P=0.020$ , 95% CI=0.038 – 0.574), medial visual cortex ( $P=0.045$ , 95% CI=0.005 –  
425 0.576) and the posterior cingulate cortex ( $P=0.029$ , 95% CI=0.023 – 0.535; **Fig. 5**) but not within  
426 the right lateral visual cortex ( $P=0.052$ , 95% CI=-0.001 – 0.297) and left posterior superior  
427 temporal gyrus ( $P=0.220$ , 95% CI=-0.031 – 0.207). The results suggest that the late blind  
428 individuals have impaired rCVR within the occipital, medial visual cortex, and the posterior  
429 cingulate cortex. Critically, comparable rCVRs between early blind individuals and sighted

430 controls suggest that the altered global signal and network connectivity of NBM in early blind  
431 individuals are not due to cerebrovascular changes, but rather that these changes are primarily  
432 driven by the altered neural activity of NBM.

433

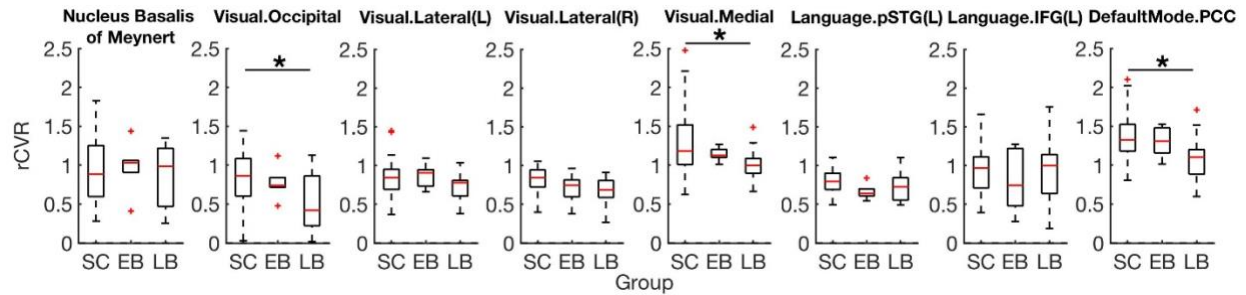

434

435 **Fig. 5.** rCVR of the nucleus basalis of Meynert and seven cortical networks that showed  
436 significant change in the early blind group. rCVRs of early blind individuals are comparable to  
437 those of sighted controls whereas rCVR of late blind individuals are significantly lower than  
438 those of sighted controls within the occipital visual cortex, medial visual cortex, and posterior  
439 cingulate cortex. The distributions are represented using box plots and the outliers are plotted  
440 as plus signs. "SC", "EB," and "LB" refer to the sighted controls, early blind and late blind  
441 groups. \* Bonferroni-corrected  $P < 0.05$ .  $N=47$ .

442

443

444 **Discussion**

445 The present results provide robust evidence that spontaneous brain activity of NBM is altered  
446 in early blind individuals while its anatomical structure and cerebrovascular response are  
447 unchanged. Specifically, we observed that both global and network connectivity of NBM is  
448 significantly enhanced in early blind individuals. The cortical networks that present increased  
449 connectivity with NBM include bilateral visual networks, language networks of the left  
450 hemisphere, and the default mode network. Further, the years of visual experience are  
451 significantly correlated with both global and network connectivity among early blind, late blind,  
452 and sighted individuals. These results provide direct evidence that NBM develops greater  
453 neuromodulatory effects on the neocortex of blind individuals, with its strongest effect on early  
454 blind individuals.

455  
456 The cholinergic innervations originating from NBM are known to play a key role in attention  
457 (Everitt and Robbins 1997; Sarter and others 2005), experience-dependent plasticity (Bakin and  
458 Weinberger 1996; Froemke and others 2007; Kilgard and Merzenich 1998), and sensory  
459 processing (Goard and Dan 2009; Pinto and others 2013). At the scale of seconds, the  
460 cholinergic neurons of NBM rapidly modulate the visual processing in V1 (Pinto and others  
461 2013) and the release of choline in the cortex is correlated with behavioral performance (Parikh  
462 and others 2007). Thus, our results of enhanced global and network connectivity of NBM  
463 suggest that blind individuals are under the greater cholinergic influence which underlies the  
464 neural processes of attention, plasticity, and sensory processing. This is consistent with the  
465 prior observation that the blind individuals have superior capacity at various non-visual tasks

466 (Amedi and others 2003; Goldreich and Kanics 2003; Gougoux and others 2004; Lessard and  
467 others 1998; Niemeyer and Starlinger 1981) and that their visual cortex is recruited for non-  
468 visual information processing (Amalric and others 2018; Amedi and others 2003; Murphy and  
469 others 2016; Norman and Thaler 2019; Sadato and others 1996). Indeed, prior studies  
470 demonstrated that the visual cortex of early blind individuals contains a greater amount of  
471 choline (Coullon and others 2015; Weaver and others 2013).

472

473 An important question that arises from our study concerns the role of stronger global  
474 connectivity of NBM in blind individuals. The brain region that has high connectivity with the  
475 rest of the brain suggests that this area is essential for coordinating large-scale brain activity  
476 patterns (Cole and others 2010). Thus, our results suggest that NBM exerts greater influence on  
477 coordinating the large-scale brain activity in blind individuals. This explanation is in line with a  
478 recent observation that NBM modulates the global signals but has minimal effect on the  
479 network connectivity (Turchi and others 2018).

480

481 Although NBM was reported to play little role in the network connectivity (Turchi and others  
482 2018), we observed that NBM has increased network connectivity in blind individuals at  
483 bilateral visual networks, language networks of the left hemisphere, and the default mode  
484 network. Different from global connectivity, the network connectivity contains information  
485 about functionally connected brain structure (Damoiseaux and others 2006). Thus, our results  
486 indicate that NBM is more functionally coupled with the visual, language, and default mode  
487 networks in blind individuals. This enhanced functional connectivity may serve to facilitate



488 cholinergic modulation during tasks. Indeed, the brain areas that showed increased activity  
489 during the non-visual tasks in blind individuals include the visual cortex (Amalric and others  
490 2018; Amedi and others 2003; Bedny and others 2011; Murphy and others 2016; Norman and  
491 Thaler 2019; Sadato and others 1996), fusiform area and the left superior temporal sulcus  
492 (Gougoux and others 2009). These areas overlap with those that showed increased network  
493 connectivity with NBM in the current study. Thus, stronger activation of these cortical areas in  
494 blind individuals observed during tasks is likely to be associated with greater cholinergic  
495 modulation of NBM.

496

497 The current results raise important questions for future studies. First, it remains unclear  
498 whether cholinergic signals in the cortical areas are directly driven by NBM activity in blind  
499 individuals. This question can be partly addressed by quantifying the amount of choline from  
500 the cortex using magnetic resonance spectroscopy and then examining the correlation between  
501 the amount of choline and the functional connectivity between NBM and the corresponding  
502 cortical areas. Secondly, it has not been explored yet whether the NBM regulates the neural  
503 activity in the cortical networks during non-visual tasks in blind individuals. While our results  
504 imply such direct regulation of NBM, we only examined the brain activity during rest, but not  
505 during the task. If further studies reveal direct modulation of NBM during tasks in blind  
506 individuals, its timescales and impact on the performance are the next important questions for  
507 future inquiry.

508

509 To summarize, our results show that the functional connectivity of NBM becomes strengthened  
510 in the absence of visual input at both global and network levels. This alteration appears to arise  
511 from neural changes of NBM, but not from structural or neurovascular changes. These findings  
512 thus suggest that stronger cholinergic modulation of NBM may serve to facilitate behavioral  
513 adaptation in blind individuals.

514

515

516

517

518

519

520 **References**

521

- 522 Amalric M, Degenhien I, Dehaene S. 2018. On the role of visual experience in mathematical  
523 development: Evidence from blind mathematicians. *Dev Cogn Neurosci* 30:314-323.
- 524 Amedi A, Raz N, Pianka P, Malach R, Zohary E. 2003. Early 'visual' cortex activation correlates  
525 with superior verbal memory performance in the blind. *Nat Neurosci* 6(7):758-66.
- 526 Bakin JS, Weinberger NM. 1996. Induction of a physiological memory in the cerebral cortex by  
527 stimulation of the nucleus basalis. *Proc Natl Acad Sci U S A* 93(20):11219-24.
- 528 Bang JW, Hamilton-Fletcher G, Chan KC. 2021. Visual Plasticity in Adulthood: Perspectives from  
529 Hebbian and Homeostatic Plasticity. *Neuroscientist*:10738584211037619.
- 530 Bedny M, Pascual-Leone A, Dodell-Feder D, Fedorenko E, Saxe R. 2011. Language processing in  
531 the occipital cortex of congenitally blind adults. *Proc Natl Acad Sci U S A* 108(11):4429-  
532 34.
- 533 Bedny M, Richardson H, Saxe R. 2015. "Visual" Cortex Responds to Spoken Language in Blind  
534 Children. *J Neurosci* 35(33):11674-81.
- 535 Bruel-Jungerman E, Davis S, Laroche S. 2007. Brain plasticity mechanisms and memory: a party  
536 of four. *Neuroscientist* 13(5):492-505.
- 537 Burton H, Snyder AZ, Conturo TE, Akbudak E, Ollinger JM, Raichle ME. 2002. Adaptive changes  
538 in early and late blind: a fMRI study of Braille reading. *J Neurophysiol* 87(1):589-607.
- 539 Cole MW, Pathak S, Schneider W. 2010. Identifying the brain's most globally connected regions.  
540 *Neuroimage* 49(4):3132-3148.
- 541 Coullon GS, Emir UE, Fine I, Watkins KE, Bridge H. 2015. Neurochemical changes in the  
542 pericalcarine cortex in congenital blindness attributable to bilateral anophthalmia. *J*  
543 *Neurophysiol* 114(3):1725-33.
- 544 Damoiseaux JS, Rombouts SA, Barkhof F, Scheltens P, Stam CJ, Smith SM and others. 2006.  
545 Consistent resting-state networks across healthy subjects. *Proc Natl Acad Sci U S A*  
546 103(37):13848-53.
- 547 Everitt BJ, Robbins TW. 1997. Central cholinergic systems and cognition. *Annu Rev Psychol*  
548 48:649-84.
- 549 Fine I, Park JM. 2018. Blindness and Human Brain Plasticity. *Annu Rev Vis Sci* 4:337-356.
- 550 Froemke RC, Merzenich MM, Schreiner CE. 2007. A synaptic memory trace for cortical receptive  
551 field plasticity. *Nature* 450(7168):425-9.
- 552 Gauthier CJ, Fan AP. 2019. BOLD signal physiology: Models and applications. *Neuroimage*  
553 187:116-127.
- 554 Goard M, Dan Y. 2009. Basal forebrain activation enhances cortical coding of natural scenes.  
555 *Nat Neurosci* 12(11):1444-9.
- 556 Goldreich D, Kanics IM. 2003. Tactile acuity is enhanced in blindness. *Journal of Neuroscience*  
557 23(8):3439-3445.
- 558 Gougoux F, Belin P, Voss P, Lepore F, Lassonde M, Zatorre RJ. 2009. Voice perception in blind  
559 persons: a functional magnetic resonance imaging study. *Neuropsychologia*  
560 47(13):2967-74.
- 561 Gougoux F, Lepore F, Lassonde M, Voss P, Zatorre RJ, Belin P. 2004. Neuropsychology: pitch  
562 discrimination in the early blind. *Nature* 430(6997):309.

- 563 Hagmann P, Cammoun L, Gigandet X, Meuli R, Honey CJ, Wedeen VJ and others. 2008. Mapping  
564 the structural core of human cerebral cortex. *PLoS Biol* 6(7):e159.
- 565 Honey CJ, Sporns O, Cammoun L, Gigandet X, Thiran JP, Meuli R and others. 2009. Predicting  
566 human resting-state functional connectivity from structural connectivity. *Proc Natl Acad*  
567 *Sci U S A* 106(6):2035-40.
- 568 Hull T, Mason H. 1995. Performance of Blind-Children on Digit-Span Tests. *Journal of Visual*  
569 *Impairment & Blindness* 89(2):166-169.
- 570 Kanjlia S, Pant R, Bedny M. 2019. Sensitive Period for Cognitive Repurposing of Human Visual  
571 Cortex. *Cereb Cortex* 29(9):3993-4005.
- 572 Kilgard MP, Merzenich MM. 1998. Cortical map reorganization enabled by nucleus basalis  
573 activity. *Science* 279(5357):1714-8.
- 574 Kupers R, Pappens M, de Noordhout AM, Schoenen J, Ptito M, Fumal A. 2007. rTMS of the  
575 occipital cortex abolishes Braille reading and repetition priming in blind subjects.  
576 *Neurology* 68(9):691-3.
- 577 Lessard N, Pare M, Lepore F, Lassonde W. 1998. Early-blind human subjects localize sound  
578 sources better than sighted subjects. *Nature* 395(6699):278-280.
- 579 Liu P, De Vis JB, Lu H. 2019. Cerebrovascular reactivity (CVR) MRI with CO2 challenge: A  
580 technical review. *Neuroimage* 187:104-115.
- 581 Liu PY, Li Y, Pinho M, Park DC, Welch BG, Lu HZ. 2017. Cerebrovascular reactivity mapping  
582 without gas challenges. *Neuroimage* 146:320-326.
- 583 Lowe MJ, Mock BJ, Sorenson JA. 1998. Functional connectivity in single and multislice  
584 echoplanar imaging using resting-state fluctuations. *Neuroimage* 7(2):119-32.
- 585 Merabet LB, Battelli L, Obretenova S, Maguire S, Meijer P, Pascual-Leone A. 2009. Functional  
586 recruitment of visual cortex for sound encoded object identification in the blind.  
587 *Neuroreport* 20(2):132-8.
- 588 Mesulam MM, Mufson EJ, Levey AI, Wainer BH. 1983. Cholinergic innervation of cortex by the  
589 basal forebrain: cytochemistry and cortical connections of the septal area, diagonal  
590 band nuclei, nucleus basalis (substantia innominata), and hypothalamus in the rhesus  
591 monkey. *J Comp Neurol* 214(2):170-97.
- 592 Mesulam MM, Mufson EJ, Levey AI, Wainer BH. 1984. Atlas of cholinergic neurons in the  
593 forebrain and upper brainstem of the macaque based on monoclonal choline  
594 acetyltransferase immunohistochemistry and acetylcholinesterase histochemistry.  
595 *Neuroscience* 12(3):669-86.
- 596 Murphy MC, Nau AC, Fisher C, Kim SG, Schuman JS, Chan KC. 2016. Top-down influence on the  
597 visual cortex of the blind during sensory substitution. *Neuroimage* 125:932-940.
- 598 Nau AC, Murphy MC, Chan KC. 2015. Use of sensory substitution devices as a model system for  
599 investigating cross-modal neuroplasticity in humans. *Neural Regen Res* 10(11):1717-9.
- 600 Niemeyer W, Starlinger I. 1981. Do the blind hear better? Investigations on auditory processing  
601 in congenital or early acquired blindness. II. Central functions. *Audiology* 20(6):510-5.
- 602 Norman LJ, Thaler L. 2019. Retinotopic-like maps of spatial sound in primary 'visual' cortex of  
603 blind human echolocators. *Proc Biol Sci* 286(1912):20191910.
- 604 Parikh V, Kozak R, Martinez V, Sarter M. 2007. Prefrontal acetylcholine release controls cue  
605 detection on multiple timescales. *Neuron* 56(1):141-54.

606 Pinto L, Goard MJ, Estandian D, Xu M, Kwan AC, Lee SH and others. 2013. Fast modulation of  
607 visual perception by basal forebrain cholinergic neurons. *Nat Neurosci* 16(12):1857-  
608 1863.

609 Ptito M, Moesgaard SM, Gjedde A, Kupers R. 2005. Cross-modal plasticity revealed by  
610 electrotactile stimulation of the tongue in the congenitally blind. *Brain* 128(Pt 3):606-14.

611 Sadato N, Pascual-Leone A, Grafman J, Ibanez V, Deiber MP, Dold G and others. 1996.  
612 Activation of the primary visual cortex by Braille reading in blind subjects. *Nature*  
613 380(6574):526-8.

614 Sarter M, Hasselmo ME, Bruno JP, Givens B. 2005. Unraveling the attentional functions of  
615 cortical cholinergic inputs: interactions between signal-driven and cognitive modulation  
616 of signal detection. *Brain Res Brain Res Rev* 48(1):98-111.

617 Scholvinck ML, Maier A, Ye FQ, Duyn JH, Leopold DA. 2010. Neural basis of global resting-state  
618 fMRI activity. *Proc Natl Acad Sci U S A* 107(22):10238-43.

619 Striem-Amit E, Cohen L, Dehaene S, Amedi A. 2012. Reading with sounds: sensory substitution  
620 selectively activates the visual word form area in the blind. *Neuron* 76(3):640-52.

621 Turchi J, Chang C, Ye FQ, Russ BE, Yu DK, Cortes CR and others. 2018. The Basal Forebrain  
622 Regulates Global Resting-State fMRI Fluctuations. *Neuron* 97(4):940-952 e4.

623 Van Boven RW, Hamilton RH, Kauffman T, Keenan JP, Pascual-Leone A. 2000. Tactile spatial  
624 resolution in blind Braille readers. *Neurology* 54(12):2230-2236.

625 Voss P, Gougoux F, Lassonde M, Zatorre RJ, Lepore F. 2006. A positron emission tomography  
626 study during auditory localization by late-onset blind individuals. *Neuroreport* 17(4):383-  
627 8.

628 Voss P, Lassonde M, Gougoux F, Fortin M, Guillemot JP, Lepore F. 2004. Early- and late-onset  
629 blind individuals show supra-normal auditory abilities in far-space. *Current Biology*  
630 14(19):1734-1738.

631 Weaver KE, Richards TL, Saenz M, Petropoulos H, Fine I. 2013. Neurochemical Changes within  
632 Human Early Blind Occipital Cortex. *Neuroscience* 252:222-233.

633 Whitfield-Gabrieli S, Nieto-Castanon A. 2012. Conn: a functional connectivity toolbox for  
634 correlated and anticorrelated brain networks. *Brain Connect* 2(3):125-41.

635 Zaborszky L, Hoemke L, Mohlberg H, Schleicher A, Amunts K, Zilles K. 2008. Stereotaxic  
636 probabilistic maps of the magnocellular cell groups in human basal forebrain.  
637 *Neuroimage* 42(3):1127-41.  
638  
639
